# Supplementary material
Source: PubMed Central journal article supplement (PMC3382834)
Supplement: supp_mol.111.077354_supplemental_data.pdf [file supp_mol.111.077354_supplemental_data.pdf]

# Muscarinic type 3 receptor induces cytoprotective signaling in salivary gland cells via EGFR transactivation

Mikihito Kajiya, Isao Ichimonji, Christine Min, Tongbo Zhu, Jin Jun-O, Qing Yu, Soulafa Almazroa, Seunghee Cha, and Toshihisa Kawai

*Molecular Pharmacology*

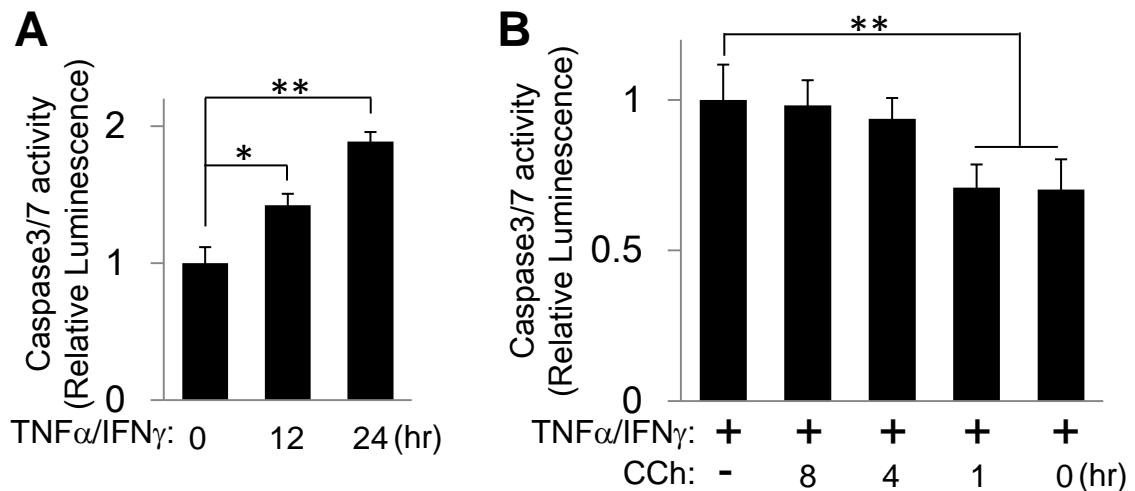

*Supplemental Fig. 1. Relation between proinflammatory cytokine and CCh on caspase3/7 activity.*

(A) HSG cells were exposed to TNF $\alpha$  (50 ng/ml)/IFN $\gamma$  (10 ng/ml) for 0, 12, or 24 hr. (B) HSG cells were pretreated with or without CCh (100  $\mu$ M) for the indicated time. Then the cells were stimulated with TNF $\alpha$  (50 ng/ml)/IFN $\gamma$  (10 ng/ml) for 24 hr. Caspase3/7 activity was indicated by luminescence activity. Values represent means  $\pm$  S.D. of three cultures. \*  $p < 0.05$ , \*\*  $p < 0.01$ : Values differ significantly ( $t$ -test).

# Muscarinic type 3 receptor induces cytoprotective signaling in salivary gland cells via EGFR transactivation

Mikihito Kajiya, Isao Ichimonji, Christine Min, Tongbo Zhu, Jin Jun-O, Qing Yu, Soulafa Almazrooa, Seunghee Cha, and Toshihisa Kawai

*Molecular Pharmacology*

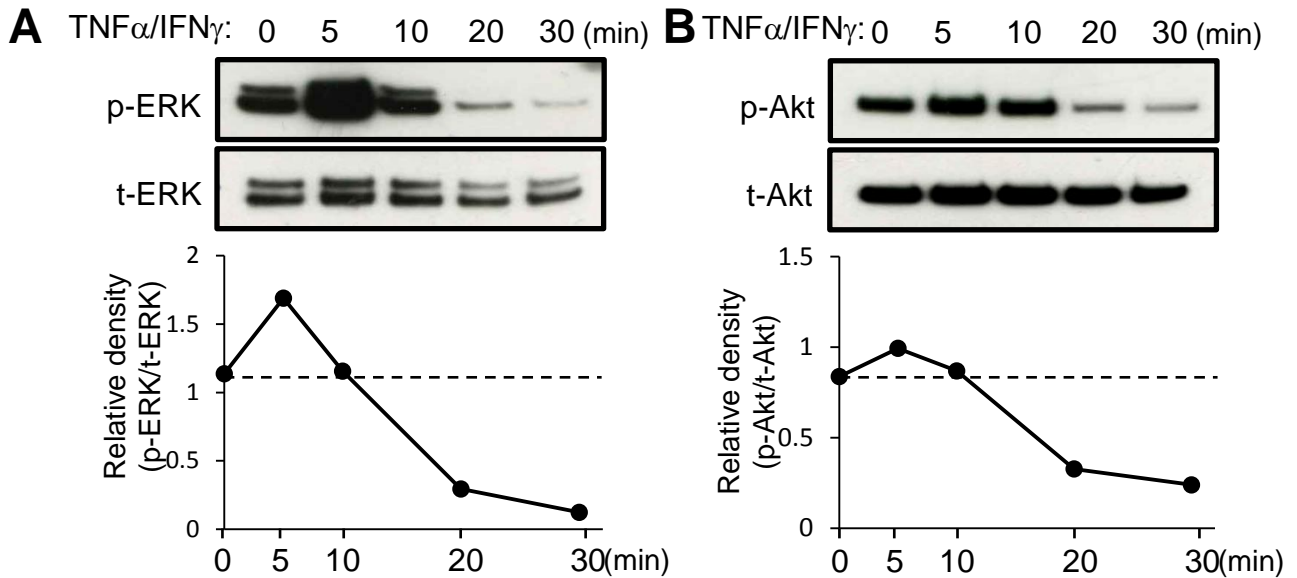

*Supplemental Fig. 2. The effect of TNF $\alpha$ /IFN $\gamma$  treatment on ERK and Akt phosphorylation level in HSG cells.*

(A and B) HSG cells were exposed to TNF $\alpha$  (50 ng/ml)/IFN $\gamma$  (10 ng/ml) for the indicated times. The phosphorylated or total ERK (A) and Akt (B) levels were analyzed by immunoblotting. Quantification of the band density was performed by densitometric scanning of each band using NIH image software.

# Muscarinic type 3 receptor induces cytoprotective signaling in salivary gland cells via EGFR transactivation

Mikihito Kajiya, Isao Ichimonji, Christine Min, Tongbo Zhu, Jin Jun-O, Qing Yu, Soulafa Almazrooa, Seunghee Cha, and Toshihisa Kawai

*Molecular Pharmacology*

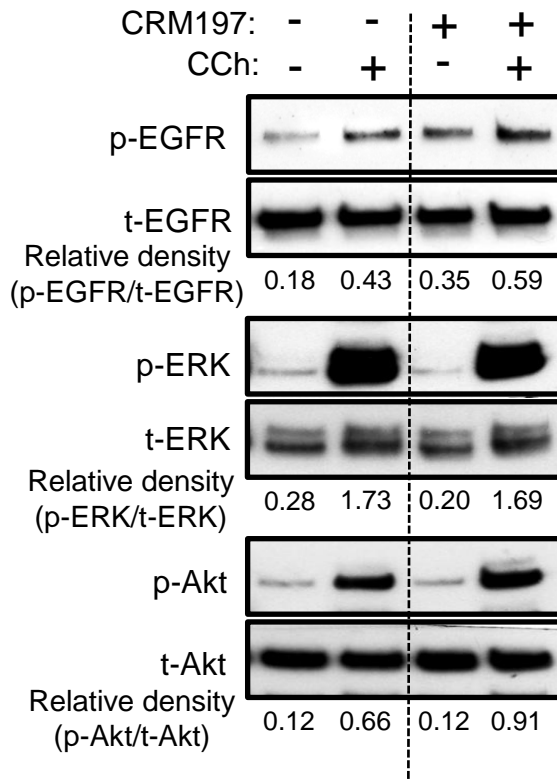

*Supplemental Fig. 3. Heparin binding (HB)-EGF inhibitor, CRM197 does not affect the CCh-induced cell survival signaling in HSG cells.*

HSG cells were pretreated with or without 1  $\mu$ g/ml of CRM197 for 30 min and then exposed to CCh (100  $\mu$ M) for 5 min. The phosphorylated or total EGFR, ERK, and Akt levels were analyzed by immunoblotting.

# Muscarinic type 3 receptor induces cytoprotective signaling in salivary gland cells via EGFR transactivation

Mikihito Kajiya, Isao Ichimonji, Christine Min, Tongbo Zhu, Jin Jun-O, Qing Yu, Soulafa Almazrooa, Seunghee Cha, and Toshihisa Kawai

*Molecular Pharmacology*

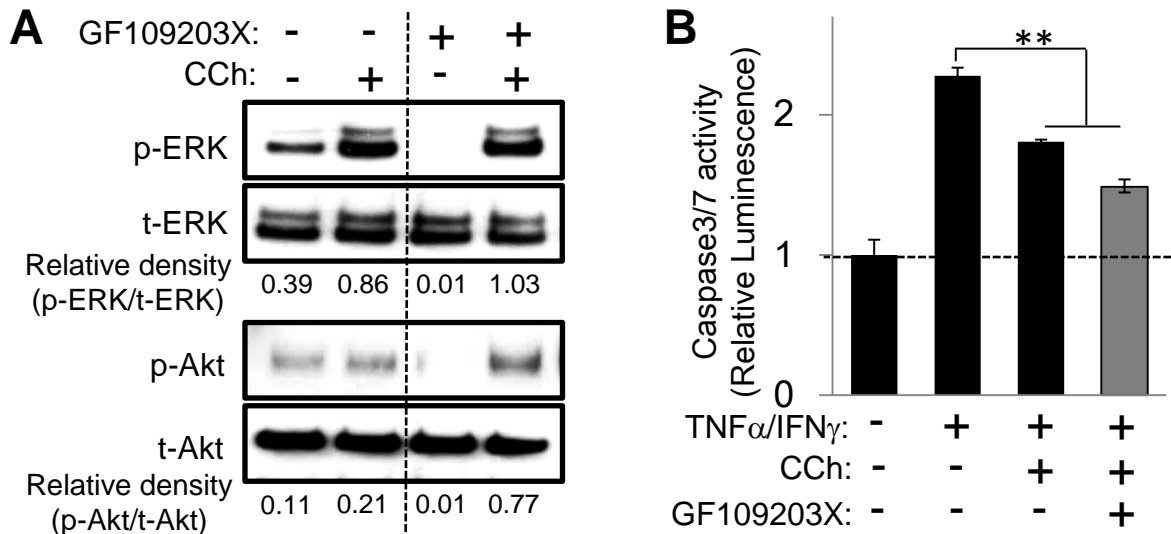

*Supplemental Fig. 4. PKC inhibitor, GF109203X does not affect the CCH-induced cell survival signaling in HSG cells.*

(A) HSG cells were pretreated with or without GF109203X (1  $\mu$ M) for 30 min and then exposed to CCh (100  $\mu$ M) for 5 min. The phosphorylated or total ERK and Akt levels were analyzed by immunoblotting. Quantification of the band density was performed by densitometric scanning of each band using NIH image software. (B) HSG cells were pretreated with or without GF109203X (1  $\mu$ M) for 30 min. Then the cells were treated with or without 100  $\mu$ M of CCh in the presence or absence of combined TNF $\alpha$  (50 ng/ml)/IFN $\gamma$  (10 ng/ml) and incubated for 24 hr. Caspase3/7 activity was indicated by luminescence activity as described in the Materials and Methods section. Values represent means  $\pm$  S.D. of three cultures. \*\*  $p < 0.01$ : Values differ significantly ( $t$ -test).
